# Supplementary material for: Deciphering the origin of dubiofossils from the Pennsylvanian of the Paraná Basin, Brazil
Source: Copernicus journal article supplement (doi:10.5194/bg-2023-56), 2023-05-17

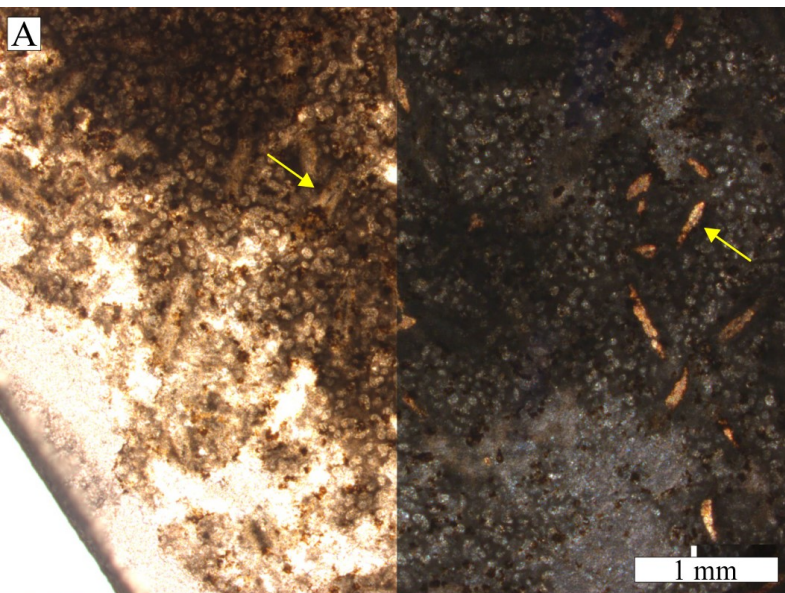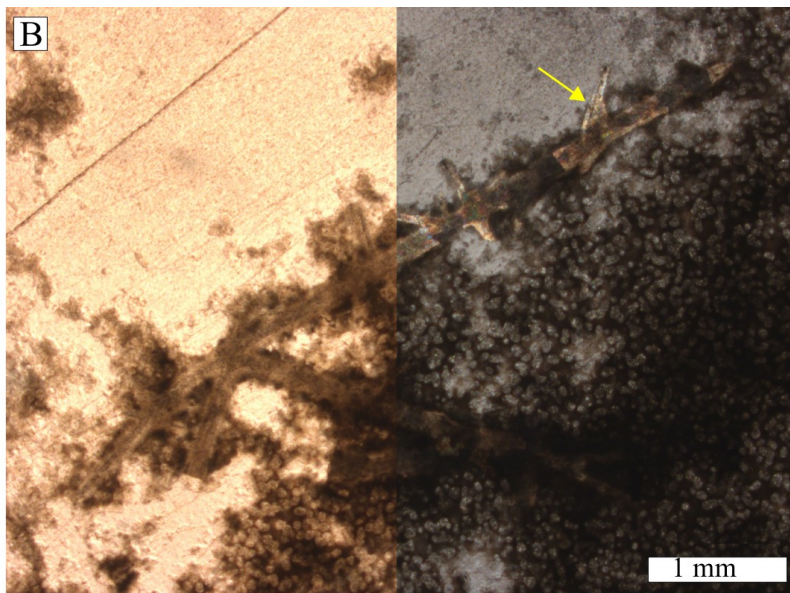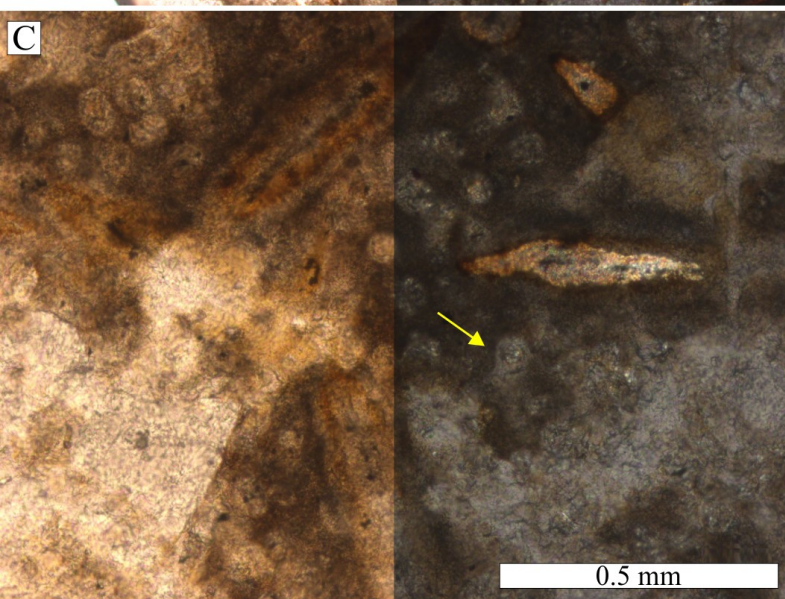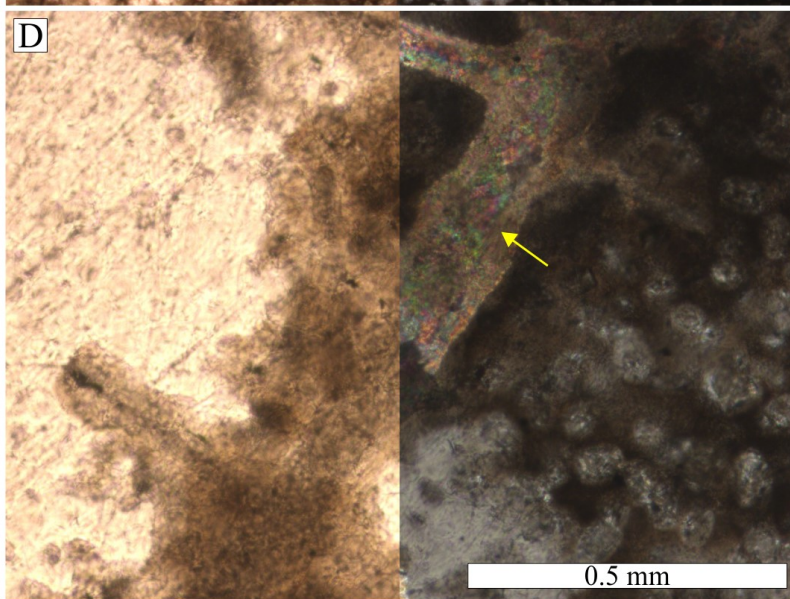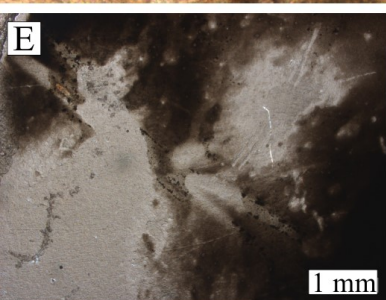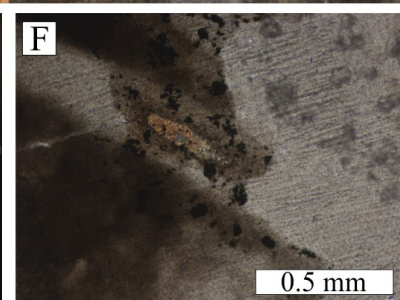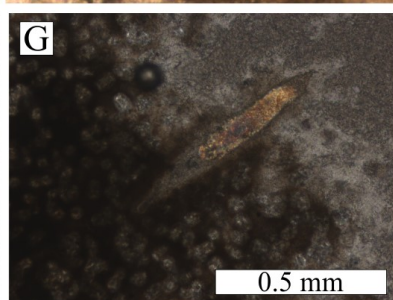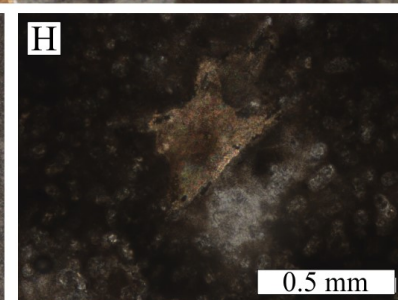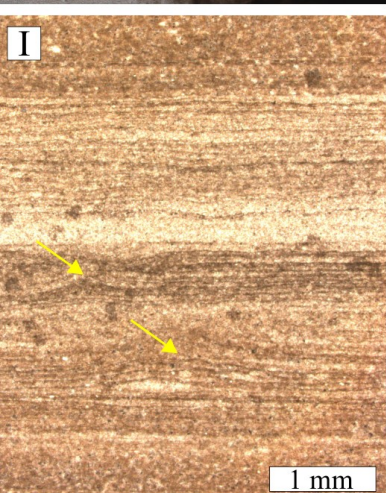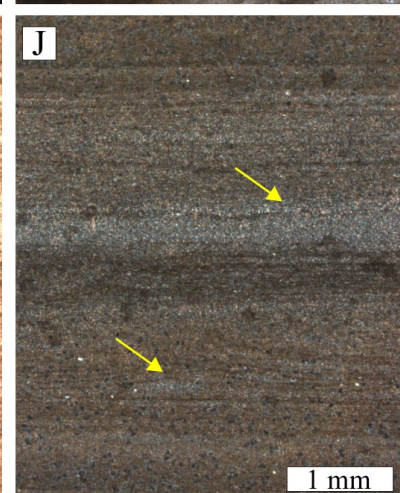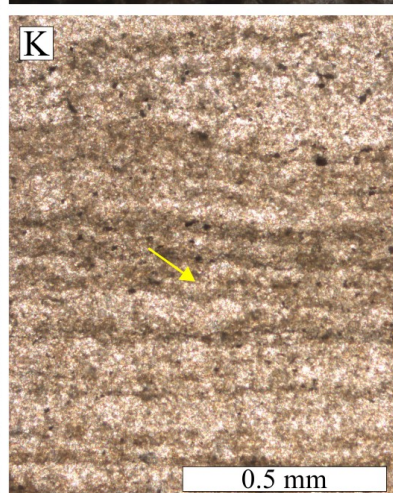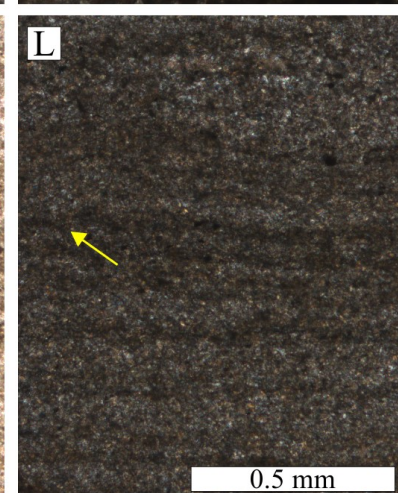

Supplement: Supplementary file [file bg-2023-56-AC3-supplement.pdf]
